# Supplementary material for: Encapsulation of AgNPs in a Lignin Isocyanate Film: Characterization and Antimicrobial Properties
Source: MDPI journal article supplement (doi:10.3390/ma16124271), 2023-06-08
Supplement: s1 [file s1]

## Supplementary Materials

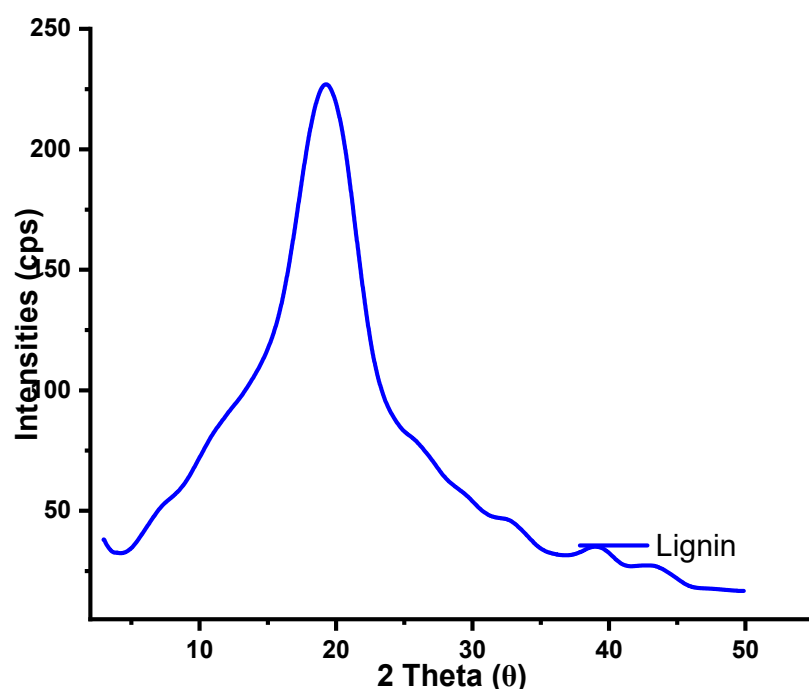

**Figure S1.** XRD profile of lignin isolated from rice husks black liquor.

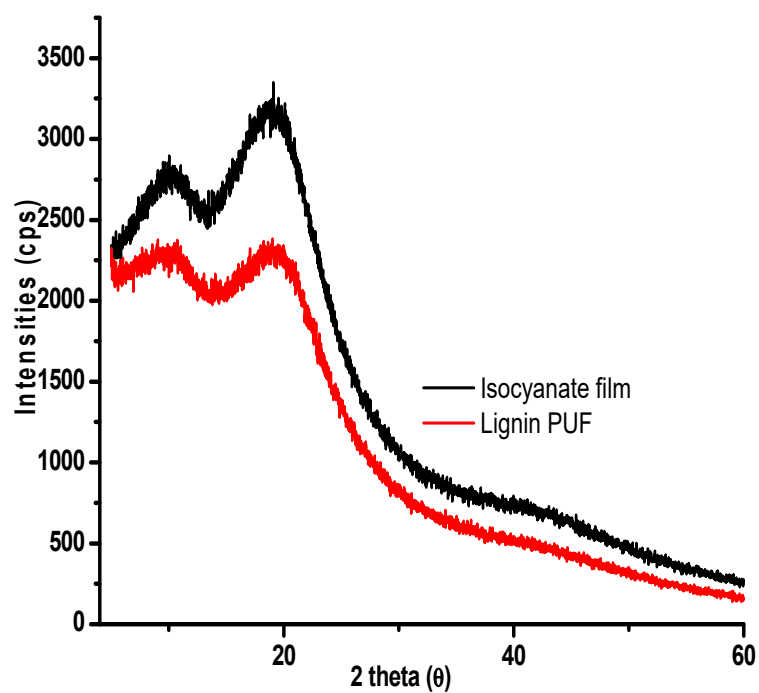

**Figure S2.** WAXRD profile of isocyanate and lignin PUF.
